# Supplementary material
Source: PubMed Central journal article supplement (PMC2383967)
Supplement: 0802405105_Supplemental_PDF.pdf [file 0802405105_Supplemental_PDF.pdf]

# Supporting Information

Alper *et al.* 10.1073/pnas.0802405105

## SI Materials and Methods

**C. elegans RNAi Screen.** The RNAi screen of the genes on Chromosome 1 was initially carried out once; RNAi clones that affected *clec-85::gfp* expression were then retested in duplicate. RNAi clones that had an effect 3/3 times were considered positive. The 192 gene RNAi candidate gene library was initially screened in triplicate. Genes that affected *clec-85::gfp* expression were then reassayed at least three more times. Any RNAi treatment that inhibited *clec-85::gfp* expression in at least half of the experiments determined by manually examining overlay plots was considered a candidate positive; this was verified by automated mean fluorescence measurements in all replicates. The negative control RNAi clone used in the library was from (1). Positive RNAi clones were sequenced to verify the identity of the dsRNA plasmid; clone sequences that differed from the predicted sequence are noted in [Tables S1 and S3](#).

RNAi clones that induced lethality or arrested nematode development were not included as positives in the analysis. These RNAi treatments were recognized because they decreased both

fluorescence and nematode size. RNAi was also repeated on solid media to verify that candidate positive clones did not affect viability and did not induce other obvious visible morphological defects (in these RNAi experiments, inhibition of *mat-1* and *vab-10* on solid media did induce lethality; data not shown). Twenty ribosomal genes on Chromosome 1 were inhibited by RNAi in our assay; all these genes are reported to induce growth defects or lethality ([www.wormbase.org](http://www.wormbase.org)). None of these twenty genes passed our viability screening, consistent with the view that we are successfully censoring genes that are required for viability. Two ribosomal proteins, *rps-27* and *rpl-22* (orthologs of *Drosophila* genes that regulate the fly innate immune response), were recovered in our candidate gene RNAi screen ([Table S3](#)). These genes could affect antimicrobial production either indirectly, because they are generally required for translation, or directly, because they are direct stress response regulators. Expression of *rpl-22* and *rps-27* is increased in the stress resistant *daf-2* mutant background, suggesting that these genes could have a specific stress response function and an essential ribosomal function (2).

1. Dillin A, Crawford DK, Kenyon C (2002) Timing requirements for insulin/IGF-1 signaling in *C. elegans*. *Science* 298:830–834.

2. Halaschek-Wiener J, *et al.* (2005) Analysis of long-lived *C. elegans* *daf-2* mutants using serial analysis of gene expression. *Genome Res* 15:603–615.

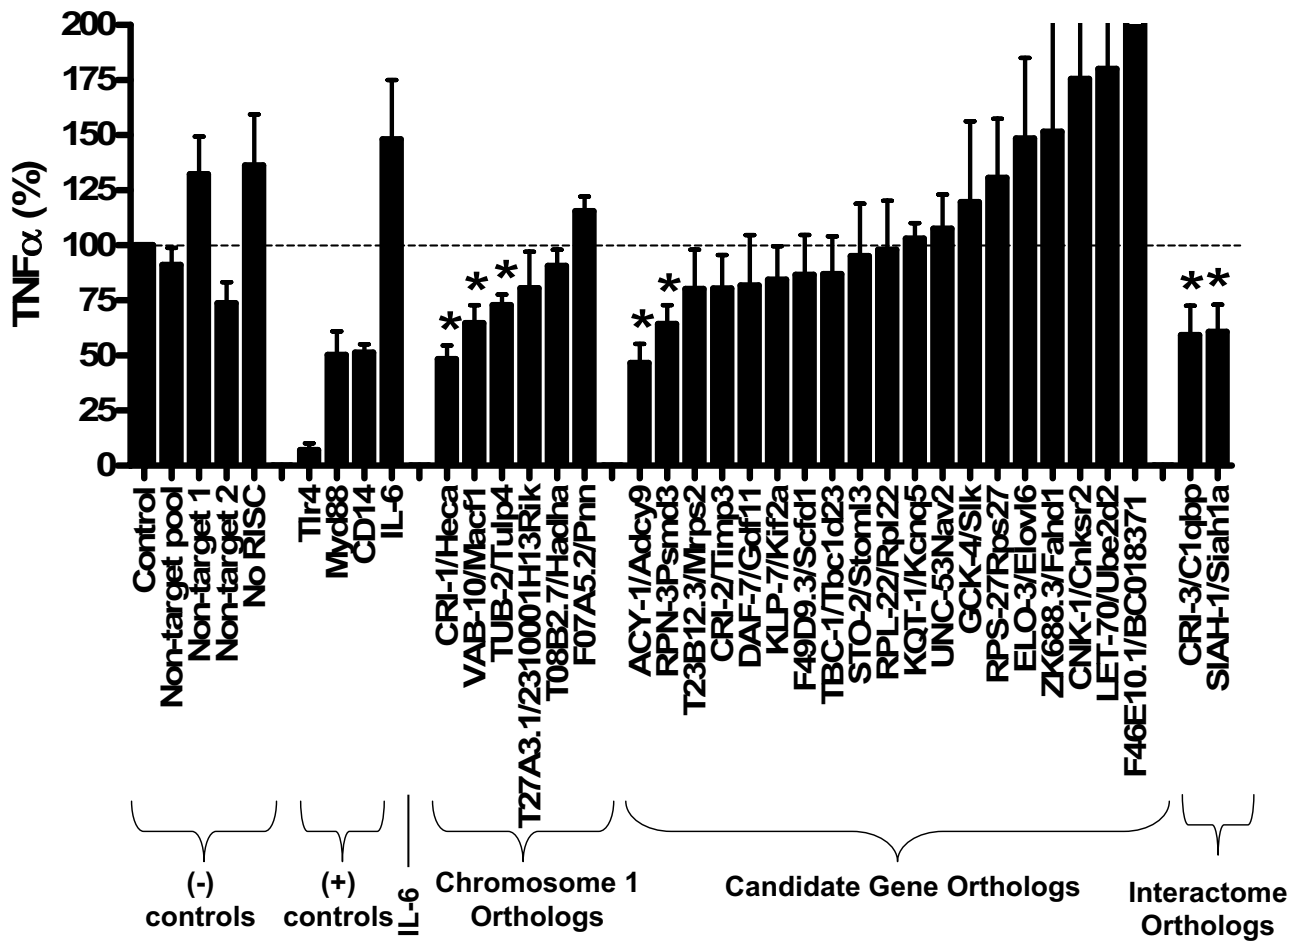

**Fig. S1.** Orthologs of *C. elegans* candidate innate immunity genes regulate TNF- $\alpha$  production in mammals. The indicated siRNA pools were transfected into a mouse macrophage cell line, the cells were induced with *E. coli* LPS, and TNF- $\alpha$  production was measured. Cytokine production was normalized relative to a negative control siRNA and cell number as described in *Materials and Methods*, and is graphed as percentage of control TNF- $\alpha$  production. Depicted from left to right are five negative controls, three positive controls (Tlr4, Myd88, and CD14), IL-6 siRNA (which should not affect TNF- $\alpha$ ), and 27 test genes orthologous to genes that affect antimicrobial production in *C. elegans*. TNF- $\alpha$  values that were significantly less than wild type in the test siRNAs ( $P < 0.05$ , *t* test) are indicated with an asterisk.

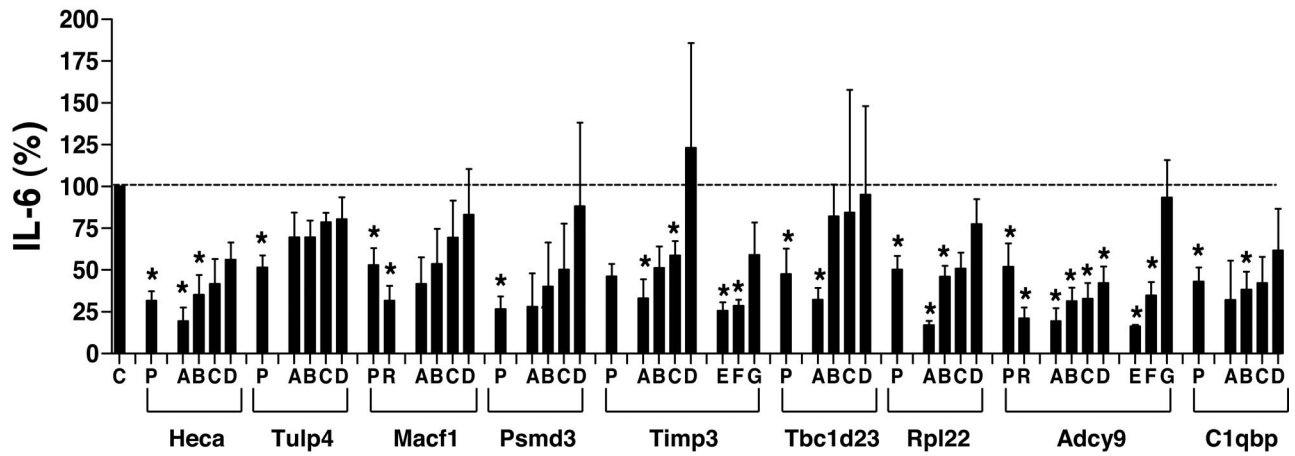

**Fig. S2.** Use of multiple siRNAs to verify the specificity of the induced cytokine phenotypes. The mouse macrophage cell line J77A4.1 was treated with the indicated siRNAs and subsequent LPS-induced IL-6 production was measured and normalized as described in *Materials and Methods* and is graphed as percentage of control IL-6 production. To verify that the siRNA-induced phenotypes described in Fig. 3 were due to specific gene inhibition and not an "off target" siRNA effect, we subsequently transfected multiple individual siRNAs for each candidate positive gene. P refers to the original test Dharmacon siRNA pool of four siRNA duplexes/gene. A–D are the four individual siRNAs present in those pools; R refers to an independently generated pool of four siRNAs that targets a particular gene; and E–G refer to 27-mer siRNAs [Kim DH, et al. (2005) Synthetic dsRNA Dicer substrates enhance RNAi potency and efficacy. *Nat Biotechnol* 23:222–226] designed to target two of the genes. Because at least two, and usually many, individual siRNAs that target these genes induce a similar IL-6 phenotype, we conclude that the siRNA effect is specific and these genes are regulating cytokine production. IL-6 values that were significantly different from wild type in the test siRNAs ( $P < 0.05$ , t test) are indicated with an asterisk.

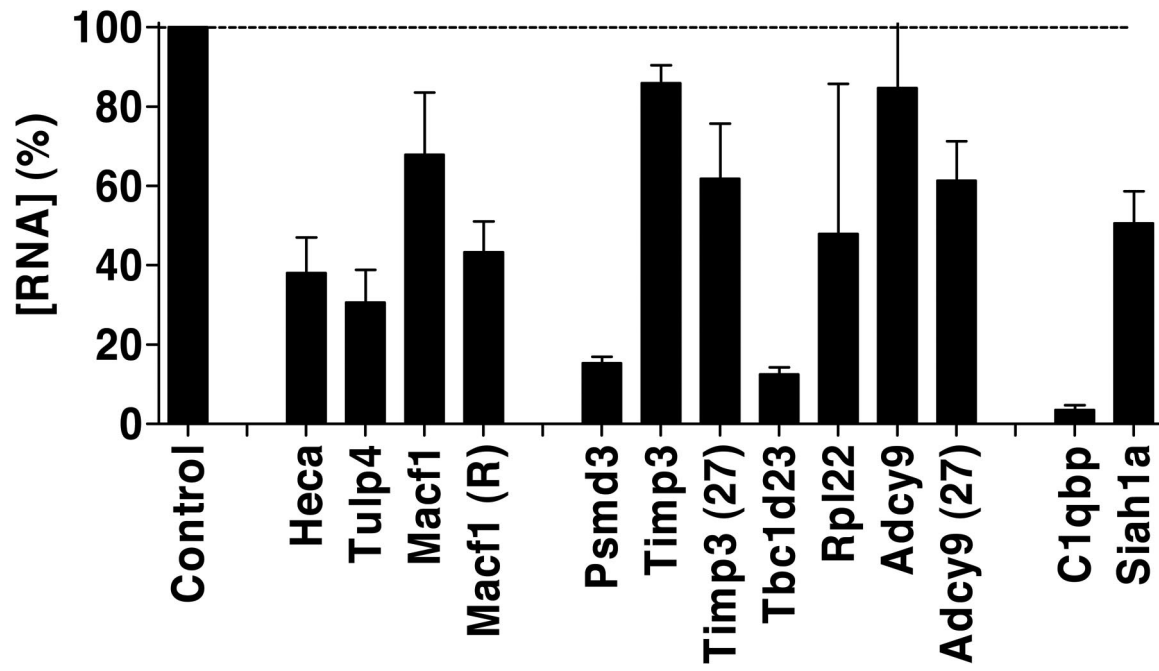

**Fig. S3.** RNA knockdown in siRNA experiments. Cells were treated with the indicated siRNAs, and expression of the corresponding cellular mRNAs was monitored by qPCR, using actin RNA as a normalization control. R refers to a second siRNA pool tested for that gene; 27 indicates a 27mer siRNA directed against that gene. The data are from three independent biological replicates.



**Table S2. One hundred ninety-two RNAi clones in the *C. elegans* RNAi library**

| Clone                                | Gene          | <i>C. elegans</i> gene description                                      | Fly locus ID | Fly gene   | Fly description                           |
|--------------------------------------|---------------|-------------------------------------------------------------------------|--------------|------------|-------------------------------------------|
| Orthologs of <i>Drosophila</i> genes |               |                                                                         |              |            |                                           |
| B0025.1                              | <i>vps-34</i> | Phosphatidylinositol 3-kinase VPS34, involved in signal transduction    | 37733        | Pi3K59F    | Phosphatidylinositol 3 kinase 59F         |
| B0495.8                              |               | Spliceosome subunit                                                     | 39956        | CG7564     |                                           |
| C04A11.3                             | <i>gck-4</i>  | Ste20-like serine/threonine protein kinase                              | 37893        | slik       | Sterile20-like kinase                     |
| C06H2.1                              | <i>atp-5</i>  | Mitochondrial F1F0-ATP synthase, subunit d/ATP7                         | 42291        | ATPsyn-d   | ATP synthase, subunit d                   |
| C07H6.4                              |               | Predicted splicing regulator, contains RRM, SWAP and RPR domains        | 37381        | CG9346     |                                           |
| C16E9.2                              |               | Uncharacterized conserved protein                                       | 36918        | CG9646     |                                           |
| C25B8.1                              | <i>kqt-1</i>  | Voltage-gated K <sup>+</sup> channel KCNQ                               | 36071        | KCNQ       | KCNQ potassium channel                    |
| C27A2.2                              | <i>rpl-22</i> | 60S ribosomal protein L22                                               | 31022        | RpL22      | Ribosomal protein L22                     |
| C30C11.2                             | <i>rpn-3</i>  | 26S proteasome regulatory complex, subunit RPN3/PSMD3                   | 35176        | Dox-A2     | Diphenol oxidase A2                       |
| C48D1.3                              | <i>cho-1</i>  | Choline transporter                                                     | 42245        | CG7708     |                                           |
| D1043.1                              |               | Uncharacterized conserved protein                                       | 39141        | defl       | deflated                                  |
| F08C6.2                              |               | Phosphorylcholine transferase/cholinephosphate cytidylyltransferase     | 117353       | Cct1       | CTP:phosphocholine cytidylyltransferase 1 |
| F10B5.4                              | <i>tub-1</i>  | Tub family proteins                                                     | 37400        | king-tubby |                                           |
| F17C8.1                              | <i>acy-1</i>  | Adenylyl cyclase                                                        | 32485        | Ac13E      | Adenylyl cyclase 35C                      |
| F32A6.5                              | <i>sto-2</i>  | Prohibitins and stomatins of the PID superfamily                        | 2768889      | CG7633     |                                           |
| F32F2.1                              | <i>uig-1</i>  | Putative guanine nucleotide exchange factor                             | 37134        | CG5503     |                                           |
| F41E6.3                              |               |                                                                         | 41675        | CG9351     |                                           |
| F43H9.1                              | <i>ech-3</i>  | Enoyl-CoA hydratase                                                     | 41533        | CG5844     |                                           |
| F45E10.1                             | <i>unc-53</i> | Nuclear pore membrane and/or filament interacting like (POMFIL) protein | 35278        | sick       | sickie                                    |
| F46E10.1                             |               | Long chain fatty acid acyl-CoA ligase                                   | 33766        | CG12512    |                                           |
| F56E10.4                             | <i>rps-27</i> | 40S ribosomal protein S27                                               | 43039        | RpS27      | Ribosomal protein S27                     |
| F59A3.4                              |               | Zinc transporter and related ZIP domain-containing proteins             | 36273        | CG13189    |                                           |
| K01C8.1                              |               | Threonine/serine dehydratases                                           | 41117        | CG8129     |                                           |
| K09H9.6                              | <i>lpd-6</i>  | RNA-binding protein required for 60S ribosomal subunit biogenesis       | 298699       | ppan       | peter pan                                 |
| K11D9.1                              | <i>klp-7</i>  | Kinesin-like protein                                                    | 32049        | Klp10A     |                                           |
| M7.1                                 | <i>let-70</i> | Ubiquitin-protein ligase                                                | 41785        | eff        | effete                                    |
| R01H10.8                             | <i>cnk-1</i>  | protein that contains a SAM domain, a PDZ domain, and a PH domain       | 36952        | cnk        | connector enhancer of ksr                 |
| R06C1.3                              | <i>wve-1</i>  | Wiskott Aldrich syndrome proteins                                       | 34519        | SCAR       | SCAR                                      |
| T01C1.3                              | <i>mbr-1</i>  | honeybee MB1k-related                                                   | 44936        | Eip93F     |                                           |
| T10E9.7                              | <i>nuo-2</i>  | vigilin; NADH-ubiquinone oxidoreductase, NDUFS3/30-kDa subunit          | 38378        | CG12079    |                                           |
| T10G3.6                              | <i>gut-2</i>  | Predicted snRNP core protein                                            | 39408        | CG10418    |                                           |
| T23B12.3                             |               | Mitochondrial/chloroplast ribosomal protein S2                          | 33688        | mRpS2      | mitochondrial ribosomal protein S2        |
| W02A11.2                             |               | Uncharacterized conserved protein                                       | 35847        | Vps25      | Vacuolar protein sorting 25               |
| W04A4.5                              |               | Uncharacterized conserved protein                                       | 31793        | l(1)G0095  | lethal (1) G0095                          |
| Y38F1A.5                             | <i>cyd-1</i>  | G1/S-specific cyclin D                                                  | 32551        | CycD       | Cyclin D                                  |
| Y45F10A.4                            |               | Selenophosphate synthetase                                              | 36587        | SelD       | selenide, water dikinase                  |
| ZK1098.1                             |               | Spliceosomal protein FBP11/Splicing factor PRP40                        | 33513        | CG3542     |                                           |
| ZK688.3                              |               | Predicted fumarylacetoacetate hydrolase                                 | 42505        | CG5793     |                                           |
| ZK792.6                              | <i>let-60</i> | Ras-related GTPase                                                      | 41140        | Ras85D     | Ras oncogene at 85D                       |

Table S2. Continued

| Clone                    | Gene                 | <i>C. elegans</i> gene description                                      | Mouse locus ID | Mouse gene    | Mouse description                                                                      |
|--------------------------|----------------------|-------------------------------------------------------------------------|----------------|---------------|----------------------------------------------------------------------------------------|
| Orthologs of mouse genes |                      |                                                                         |                |               |                                                                                        |
| B0414.7                  | <i>mtk-1</i>         | MEKK and related serine/threonine protein kinases                       | 26406          | Map3k3        | mitogen activated protein kinase kinase kinase 3                                       |
| C07H6.5                  | <i>cgh-1</i>         | ATP-dependent RNA helicase                                              | 13209          | Ddx6          | DEAD (Asp-Glu-Ala-Asp) box polypeptide 6                                               |
| C15H11.8                 |                      | RNA polymerase I transcription factor TFIIIS, subunit A12.2/RPA12       | 66136          | Znrd1         | zinc ribbon domain containing, 1                                                       |
| C15H11.9                 |                      | Regulator of ribosome synthesis                                         | 59014          | Rrs1          | RRS1 ribosome biogenesis regulator homolog                                             |
| C25A1.10                 | <i>dao-5</i>         | Nucleolar GTPase/ATPase p130                                            | 70769          | Nolc1         | nucleolar and coiled-body phosphoprotein 1                                             |
| C34C6.5                  | <i>tag-274</i>       | Sphingosine kinase, involved in sphingolipid metabolism                 | 20698          | Sphk1         | sphingosine kinase 1                                                                   |
| C41G7.5                  | <i>ahr-1</i>         | Aryl-hydrocarbon receptor                                               | 11622          | Ahr           | aryl-hydrocarbon receptor                                                              |
| C47E12.4                 | <i>pyp-1</i>         | Inorganic pyrophosphatase/ Nucleosome remodeling factor, subunit NURF38 | 67895          | Ppa1          | pyrophosphatase (inorganic) 1                                                          |
| C50D2.5                  |                      | contains similarity to Pfam domain PF00076 RNA recognition motif        | 66055          | 0610009D07Rik | riken cDNA                                                                             |
| C54H2.5                  | <i>sft-4</i>         | Putative cargo transport protein ERV29                                  | 20932          | Surf4         | surfeit gene 4                                                                         |
| D2024.3                  | <i>elo-3</i>         | Long chain fatty acid elongase                                          | 170439         | Elov6         | ELOVL family member 6, elongation of long chain fatty acids                            |
| F14B4.3                  |                      | RNA polymerase I, second largest subunit                                | 20017          | Rpo 1–2       | RNA polymerase 1–2                                                                     |
| F20D1.2                  |                      | Uncharacterized conserved protein, contains TBC and Rhodanese domains   | 67581          | Tbc1d23       | TBC1 domain family, member 23                                                          |
| F23C8.6                  | <i>phi-24</i>        | Vacuolar assembly/sorting protein DID2                                  | 67028          | 2610002M06Rik | riken cDNA                                                                             |
| F32B5.8                  | <i>cpz-1</i>         | Cysteine proteinase Cathepsin L                                         | 64138          | Ctsz          | cathepsin Z                                                                            |
| F37B12.2                 | <i>gcs-1</i>         | Gamma-glutamylcysteine synthetase                                       | 14629          | Glc           | glutamate-cysteine ligase, catalytic subunit                                           |
| F43D9.3                  |                      | Vesicle trafficking protein Sly1                                        | 76983          | Scfd1         | sec1 family domain containing 1                                                        |
| F45H7.4                  | <i>prk-2</i>         | Serine/threonine protein kinase                                         | 18712          | Pim1          | proviral integration site 1                                                            |
| F53E10.6                 |                      | Uncharacterized conserved protein possible pseudogene?                  | 67223          | 2810430M08Rik | riken cDNA                                                                             |
| F55A11.4                 |                      |                                                                         | 66972          | Slc25a23      | solute carrier family 25; member 23                                                    |
| F56E10.2                 | <i>fhod-2</i>        | Rho GTPase effector BNI1 and related formins                            | 208846         | Daam1         | dishevelled associated activator of morphogenesis 1                                    |
| K01A2.5                  |                      | Predicted hydrolase                                                     | 68021          | Bph1          | biphenyl hydrolase-like (serine hydrolase, breast epithelial mucin-associated antigen) |
| K02F2.3                  | <i>tag-203</i>       | Splicing factor 3b, subunit 3                                           | 101943         | Sf3b3         | splicing factor 3b, subunit 3                                                          |
| K07C11.5                 | <i>cri-2/tag-225</i> | Metalloproteinase inhibitor TIMP and related proteins                   | 21858          | Timp2         | tissue inhibitor of metalloproteinase 2                                                |
| K07H8.10                 |                      |                                                                         | 17975          | Ncl           | nucleolin                                                                              |
| K08B4.1                  | <i>lag-1</i>         | Recombination signal binding protein-J kappa(CBF1, Su(H), HS2NF5)       | 19664          | Rbpsuh        | recombining binding protein suppressor of hairless                                     |
| M110.5                   | <i>dab-1</i>         | Adaptor protein Disabled                                                | 13132          | Dab2          | disabled homolog 2                                                                     |
| R04B5.5                  |                      | Sorbitol dehydrogenase                                                  | 20322          | Sord          | sorbitol dehydrogenase                                                                 |
| T10H10.3                 |                      | contains similarity to Pfam domain PF00397 WW domain                    | 64010          | Sav1          | salvador homolog 1                                                                     |
| T11B7.4                  | <i>alp-1</i>         | Adaptor protein Enigma and related PDZ-LIM proteins                     | 24131          | Ldb3          | LIM domain binding 3                                                                   |
| T22H2.5                  |                      | Phospholipid scramblase                                                 | 22038          | Plscr1        | phospholipid scramblase 1                                                              |
| T26E3.3                  | <i>par-6</i>         | Cell polarity protein PAR6                                              | 93737          | Pardg6        | par-6 partitioning defective 6 homolog gamma                                           |
| W01B11.3                 |                      | Ribosome biogenesis protein - Nop58p/Nop5p                              | 55989          | Nol5          | nucleolar protein 5                                                                    |
| W02B12.10                |                      | Methyltransferase-like protein                                          | 17299          | Mettl1        | methyltransferase-like 1                                                               |
| W06H3.2                  | <i>pus-1</i>         | Pseudouridylate synthase                                                | 56361          | Pus1          | pseudouridine synthase 1                                                               |

| Clone     | Gene         | <i>C. elegans</i> gene description                                                                 | Mouse locus ID | Mouse gene    | Mouse description                                 |
|-----------|--------------|----------------------------------------------------------------------------------------------------|----------------|---------------|---------------------------------------------------|
| Y53C12B.2 |              | Predicted RNA-binding protein Pno1p interacting with Nob1p and involved in 26S proteasome assembly | 66249          | 1810003N24Rik | riken cDNA                                        |
| ZK1290.4  | <i>nfi-1</i> | Nuclear factor I                                                                                   | 18029          | Nfic          | nuclear factor I/C                                |
| ZK688.3   |              | Predicted fumarylacetoacetate hydralase                                                            | 68636          | Fahd1         | fumarylacetoacetate hydrolase domain containing 1 |



Table S2. Continued

| Clone                                     | Gene           | <i>C. elegans</i> gene description                                                     |
|-------------------------------------------|----------------|----------------------------------------------------------------------------------------|
| <i>C. elegans</i> candidates and controls |                |                                                                                        |
| B0218.8                                   | <i>clec-52</i> | C-type lectin                                                                          |
| B0285.4                                   |                | Carboxymethyl transferase                                                              |
| B0334.8                                   | <i>age-1</i>   | Phosphatidylinositol 3-kinase catalytic subunit (p110)                                 |
| B0412.2                                   | <i>daf-7</i>   | Transforming growth factor beta, bone morphogenetic protein and related proteins       |
| C02A12.4                                  | <i>lys-7</i>   | <i>N</i> -acetylmuraminidase/lysozyme                                                  |
| C02H7.3                                   | <i>aex-3</i>   | MAPK-activating protein DENN                                                           |
| C04F12.3                                  | <i>ikb-1</i>   | Ankyrin repeat; ortholog of human BCL3                                                 |
| C04F12.8                                  |                | Dual specificity phosphatase                                                           |
| C05B10.1                                  | <i>lip-1</i>   | Dual specificity phosphatase                                                           |
| C05D2.1                                   | <i>daf-4</i>   | Transforming growth factor beta/activin receptor subfamily of serine/threonine kinases |
| C09G5.6                                   | <i>bli-1</i>   | Collagens (type IV and type XIII), and related proteins                                |
| C12D8.10                                  | <i>akt-1</i>   | Serine/threonine protein kinase                                                        |
| C16A3.2                                   |                | Dual specificity phosphatase                                                           |
| C17G10.5                                  | <i>lys-8</i>   | <i>N</i> -acetylmuraminidase/lysozyme                                                  |
| C24F3.2                                   |                | Dual specificity phosphatase                                                           |
| C28C12.5                                  | <i>spp-8</i>   | Prosaposin                                                                             |
| C28C12.7                                  | <i>spp-10</i>  | Prosaposin                                                                             |
| C32D5.2                                   | <i>sma-6</i>   | Activin A type IB receptor, serine/threonine protein kinase                            |
| C35D10.9                                  | <i>ced-4</i>   | Apoptotic ATPase                                                                       |
| C39F7.4                                   | <i>rab-1</i>   | GTPase Rab1/YPT1, small G protein superfamily, and related GTP-binding proteins        |
| C47C12.3                                  | <i>ref-2</i>   | orthologous to the human gene ZINC FINGER PROTEIN OF CEREBELLUM ZIC2                   |
| C53D6.2                                   | <i>unc-129</i> | Transforming growth factor beta, bone morphogenetic protein and related proteins       |
| F01G10.8                                  | <i>daf-14</i>  | TGFbeta receptor signaling protein SMAD and related proteins                           |
| F08B1.1                                   | <i>vhp-1</i>   | Dual specificity phosphatase                                                           |
| F08F1.6                                   | <i>spp-13</i>  | saposin-like protein family                                                            |
| F10D11.6                                  |                | BPI/LBP/CETP family protein                                                            |
| F11A1.3                                   | <i>daf-12</i>  | member of the steroid hormone receptor superfamily                                     |
| F13B10.1                                  | <i>tir-1</i>   | SARM protein (with sterile alpha and armadillo motifs)                                 |
| F13D11.3                                  |                | Dual specificity phosphatase                                                           |
| F16F9.2                                   | <i>dpy-6</i>   | Unnamed protein                                                                        |
| F17E9.11                                  | <i>lys-10</i>  | <i>N</i> -acetylmuraminidase/lysozyme                                                  |
| F20D12.2                                  |                | Nuclear protein export factor                                                          |
| F25E2.5                                   | <i>daf-3</i>   | TGFbeta receptor signaling protein SMAD and related proteins                           |
| F25H2.1                                   | <i>tli-1</i>   | Toll-interacting protein                                                               |
| F26A3.4                                   |                | Dual specificity phosphatase                                                           |
| F27C8.4                                   | <i>spp-18</i>  | saposin-like protein family                                                            |
| F28C6.8                                   |                | Dual specificity phosphatase                                                           |
| F28D1.3                                   | <i>thn-1</i>   | Thaumatococcus family; Pathogenesis related proteins, group 5, and related proteins    |
| F28D1.4                                   | <i>thn-3</i>   | Thaumatococcus family; Pathogenesis related proteins, group 5, and related proteins    |

| Clone     | Gene           | <i>C. elegans</i> gene description                                                  |
|-----------|----------------|-------------------------------------------------------------------------------------|
| F28D1.5   | <i>thn-2</i>   | Thaumatococcus family; Pathogenesis related proteins, group 5, and related proteins |
| F29C4.1   | <i>daf-1</i>   | Activin A type IB receptor, serine/threonine protein kinase                         |
| F32D8.9   | <i>spp-16</i>  | saposin-like protein family                                                         |
| F33E2.2   | <i>dlk-1</i>   | Serine/threonine protein kinase, contains leucine zipper domain                     |
| F35C5.6   | <i>clec-63</i> | Lectin C-type domain/CUB domain                                                     |
| F35C5.8   | <i>clec-65</i> | Lectin C-type domain/CUB domain                                                     |
| F35C5.9   | <i>clec-66</i> | Lectin C-type domain/CUB domain                                                     |
| F35C8.1   |                | Serine/threonine protein kinase                                                     |
| F35C8.2   |                | Serine/threonine protein kinase                                                     |
| F38A1.5   |                | C-type lectin                                                                       |
| F39G3.8   | <i>tig-2</i>   | Transforming growth factor beta, bone morphogenetic protein and related proteins    |
| F42G10.2  | <i>mkk-4</i>   | Mitogen-activated protein kinase (MAPK) kinase MKK4                                 |
| F42G8.3   | <i>pmk-2</i>   | Mitogen-activated protein kinase                                                    |
| F42G8.4   | <i>pmk-3</i>   | Mitogen-activated protein kinase                                                    |
| F52F12.3  | <i>mom-4</i>   | Tyrosine kinase specific for activated (GTP-bound) p21cdc42Hs                       |
| F53A2.8   | <i>mtm-6</i>   | Myotubularin-related phosphatidylinositol 3-phosphate 3-phosphatase MTM6            |
| F53H8.2   | <i>arr-1</i>   | beta-arrestin ortholog                                                              |
| F54B11.11 |                | contains similarity to Pfam domain PF02408 CUB-like domain                          |
| F54B8.5   | <i>abf-3</i>   | antibacterial factor related                                                        |
| F55G11.5  | <i>dod-22</i>  | contains similarity to Pfam domain PF02408 CUB-like domain                          |
| F56D12.4  | <i>jip-1</i>   | Mitogen-activated protein kinase scaffold protein JIP                               |
| F58B3.1   | <i>lys-4</i>   | <i>N</i> -acetylmuraminidase/lysozyme                                               |
| F58B3.2   | <i>lys-5</i>   | <i>N</i> -acetylmuraminidase/lysozyme                                               |
| F59A6.1   | <i>nsy-1</i>   | Serine/threonine protein kinase                                                     |
| F59E12.12 | <i>bli-2</i>   | Collagens (type IV and type XIII), and related proteins                             |
| H16D19.1  | <i>clec-13</i> | C-type lectin                                                                       |
| H24G06.1  |                | WD40 repeat protein                                                                 |
| K04A8.9   | <i>spp-19</i>  | saposin-like protein family                                                         |
| K08A8.1   | <i>mek-1</i>   | Mitogen-activated protein kinase (MAPK) kinase MKK7/JNKK2                           |
| K08D8.5   |                | contains similarity to Pfam domain PF02408 CUB-like domain                          |
| K09B11.1  | <i>pik-1</i>   | Serine/threonine protein kinase; pelle/IRAK kinase                                  |
| K09F5.3   | <i>spp-14</i>  | saposin-like protein family                                                         |
| K11E8.1   | <i>unc-43</i>  | Ca <sup>2+</sup> /calmodulin-dependent protein kinase, EF-Hand protein superfamily  |
| M04C9.5   | <i>dyf-5</i>   | MAPK related serine/threonine protein kinase                                        |
| R03G5.2   | <i>sek-1</i>   | Mitogen-activated protein kinase (MAPK) kinase MKK3/MKK6                            |
| R03G5.2   | <i>sek-1</i>   | Mitogen-activated protein kinase (MAPK) kinase MKK3/MKK6                            |
| R07B1.10  | <i>lec-8</i>   | Galectin, galactose-binding lectin                                                  |
| R09B5.3   | <i>cnc-2</i>   | Unnamed protein                                                                     |
| R12B2.1   | <i>sma-4</i>   | TGFbeta receptor signaling protein SMAD and related proteins                        |
| R13A5.1   | <i>cup-5</i>   | Mucopolysaccharide and related proteins                                             |
| R13F6.6   | <i>zak-1</i>   | mitogen-activated protein kinase kinase kinase                                      |

| Clone      | Gene           | <i>C. elegans</i> gene description                                                     |
|------------|----------------|----------------------------------------------------------------------------------------|
| R13F6.9    | <i>sma-3</i>   | TGFbeta receptor signaling protein<br>SMAD and related proteins                        |
| R13H8.1    | <i>daf-16</i>  | Transcription factor of the<br>Forkhead/HNF3 family                                    |
| R53.4      |                | Mitochondrial F1F0-ATP synthase,<br>subunit f                                          |
| T01E8.2    | <i>ref-1</i>   | protein with two basic<br>helix-loop-helix (bHLH) domains                              |
| T07A9.3    | <i>kgb-1</i>   | Jun-N-terminal kinase (JNK)                                                            |
| T07C4.4    | <i>spp-1</i>   | saposin-like protein family                                                            |
| T07D10.4   | <i>clec-15</i> | C-type lectin                                                                          |
| T08A9.10   | <i>spp-6</i>   | saposin-like protein family                                                            |
| T08A9.8    | <i>spp-4</i>   | Prosaposin                                                                             |
| T08A9.9    | <i>spp-5</i>   | saposin-like protein family                                                            |
| T17E9.1    | <i>kin-18</i>  | Serine/threonine protein kinase                                                        |
| T19E7.2    | <i>skn-1</i>   | bZIP transcription factor NRF1                                                         |
| T22G5.7    | <i>spp-12</i>  | saposin-like protein family                                                            |
| T22H6.5    | <i>abf-5</i>   | antibacterial factor related                                                           |
| T24B8.3    |                |                                                                                        |
| T25C12.2   | <i>spp-9</i>   | saposin-like protein family                                                            |
| T25D10.3   | <i>spp-11</i>  | saposin-like protein family                                                            |
| T25F10.2   | <i>dlb-1</i>   | Transforming growth factor beta,<br>bone morphogenetic protein and<br>related proteins |
| VZC374L.1  |                | Mitogen-activated protein kinase<br>(MAPK) kinase MKK4                                 |
| W05E7.1    | <i>grd-3</i>   | hedgehog-like family                                                                   |
| W10D5.1    | <i>mef-2</i>   | MADS box transcription factor                                                          |
| Y22F5A.4   | <i>lys-1</i>   | <i>N</i> -acetylmuraminidase/lysozyme                                                  |
| Y22F5A.5   | <i>lys-2</i>   | <i>N</i> -acetylmuraminidase/lysozyme                                                  |
| Y22F5A.6   | <i>lys-3</i>   | <i>N</i> -acetylmuraminidase/lysozyme                                                  |
| Y38H6C.22  | <i>abf-4</i>   | antibacterial factor related                                                           |
| Y47H9C.4   | <i>ced-1</i>   | Proteins containing Ca <sup>2+</sup> -binding<br>EGF-like domains                      |
| Y53C10A.12 | <i>hsf-1</i>   | Heat shock transcription factor                                                        |
| Y55D5A.5   | <i>daf-2</i>   | Insulin/growth factor receptor                                                         |
| ZC416.4    | <i>kgb-2</i>   | Jun-N-terminal kinase (JNK)                                                            |
| ZC449.3    |                | Mitogen-activated protein kinase<br>(MAPK) kinase MKK4                                 |
| ZK1098.10  | <i>unc-16</i>  | JNK/SAPK-associated protein-1                                                          |
| ZK370.2    | <i>sma-2</i>   | TGFbeta receptor signaling protein<br>SMAD and related proteins                        |
| ZK6.7      |                | Triglyceride lipase-cholesterol<br>esterase                                            |
| ZK757.2    |                | Dual specificity phosphatase                                                           |
| ZK792.6    | <i>let-60</i>  | Ras-related GTPase                                                                     |

**Table S3. Genes in RNAi library that regulate *clec-85* expression**

| Clone    | Gene                      | Gene description                                                                 | GFP, % | P     |
|----------|---------------------------|----------------------------------------------------------------------------------|--------|-------|
| B0412.2  | <i>daf-7</i>              | Transforming growth factor beta, bone morphogenetic protein and related proteins | 66     | 0.16  |
| C03G6.11 | <i>srh-231</i> *          | Predicted olfactory G-protein coupled receptor                                   | 71     | <0.05 |
| C04A11.3 | <i>gck-4</i>              | Ste20-like serine/threonine protein kinase                                       | 59     | <0.05 |
| C25B8.1  | <i>kqt-1</i>              | Voltage-gated K <sup>+</sup> channel KCNQ                                        | 53     | <0.05 |
| C27A2.2  | <i>rpl-22</i>             | 60S ribosomal protein L22                                                        | 60     | <0.05 |
| C30C11.2 | <i>rpn-3</i>              | 26S proteasome regulatory complex, subunit RPN3/PSMD3                            | 43     | <0.05 |
| C54H2.5  | <i>sft-4</i>              | Putative cargo transport protein ERV29                                           | 88     | 0.21  |
| D2024.3  | <i>elo-3</i>              | Long chain fatty acid elongase                                                   | 74     | 0.05  |
| F13B10.1 | <i>tir-1</i>              | SARM protein (with sterile alpha and armadillo motifs)                           | 33     | <0.05 |
| F13B10.1 | <i>tir-1</i> <sup>†</sup> | SARM protein (with sterile alpha and armadillo motifs)                           | 52     | <0.05 |
| F17C8.1  | <i>acy-1</i>              | Adenylyl cyclase                                                                 | 78     | 0.05  |
| F20D1.2  | <i>tbc-1</i>              | Uncharacterized conserved protein, contains TBC and Rhodanese domains            | 62     | <0.05 |
| F20D12.2 |                           | Nuclear protein export factor                                                    | 82     | 0.13  |
| F32A6.5  | <i>sto-2</i>              | Prohibitins and stomatins of the PID superfamily                                 | 72     | <0.05 |
| F35C5.8  | <i>clec-65</i>            | Lectin C-type domain/CUB domain                                                  | 55     | <0.05 |
| F43D9.3  |                           | Vesicle trafficking protein Sly1                                                 | 88     | 0.19  |
| F45E10.1 | <i>unc-53</i>             | Nuclear pore membrane and/or filament interacting like (POMFIL) protein          | 66     | <0.05 |
| F46E10.1 |                           | Long chain fatty acid acyl-CoA ligase                                            | 50     | <0.05 |
| F56E10.4 | <i>rps-27</i>             | 40 s ribosomal protein S27                                                       | 47     | <0.05 |
| F59A6.1  | <i>nsy-1</i>              | Serine/threonine protein kinase                                                  | 31     | <0.05 |
| F59A6.1  | <i>nsy-1</i> <sup>†</sup> | Serine/threonine protein kinase                                                  | 73     | <0.05 |
| K07C11.5 | <i>cri-2/tag-225</i>      | Metalloproteinase inhibitor TIMP and related proteins                            | 68     | <0.05 |
| K11D9.1  | <i>klp-7</i>              | Kinesin-like protein                                                             | 77     | <0.05 |
| M7.1     | <i>let-70</i>             | Ubiquitin-protein ligase                                                         | 49     | <0.05 |
| R01H10.8 | <i>cnk-1</i>              | protein that contains a SAM domain, a PDZ domain, and a PH domain                | 89     | 0.16  |
| T23B12.3 |                           | Mitochondrial/chloroplast ribosomal protein S2                                   | 85     | 0.15  |
| ZK688.3  |                           | Predicted fumarylacetoacetate hydralase                                          | 56     | <0.05 |

\*Based on E. coli RNAi clone sequencing, gene differs from predicted gene in library.

<sup>†</sup>The control genes *tir-1* and *nsy-1* were present in the library in duplicate.

**Table S4. qPCR Primers used for monitoring siRNA-mediated gene inhibition**

| Mouse gene | Primer 1                              | Primer 2                                       |
|------------|---------------------------------------|------------------------------------------------|
| Actin      | CTG AAC CCT AAG GCC AAC CGT G         | CCG TCT CCG GAG TCC ATC ACA ATG                |
| Heca       | CGCTAAGAATGGAGCTCCTTGCC               | CAGGTGCTGCAGGGACAGTGC                          |
| Tulp4      | CCACAACAGTGAGGTTGTGCTGGTGAG           | CTGAGCCCCACGGTCATTGAC                          |
| Macf1      | GAAGAGATGCAGATGAAACTGGAGCG            | CACTGGTATGGATATGCTGCTGTGTTTC                   |
| Psm3       | GCTACAAAGAGGCACAGAAAATCTCTGATGACC     | GGGCATGCAAGAAGCTGCGCACCAC                      |
| Timp3      | CTC CGA CAT CGT GAT CCG GGC CAA AG    | CA TCT GCT TAA TAG TGT AGA CCA GAG TGC CAA AGG |
| Tbc1d23    | CTC CTG TGG ACC GGC ACG TGA GCA GC    | GTC ATA TTC CTC TTC ATC GCC GAT GCT G          |
| Rpl22      | GCT GCC AAT TTT GAG CAG TTC CTC CAG G | GCG TTC GAT GGT CAC GAC TCC TCC GCC            |
| Adcy9      | CCA GCT ACC AGG AAG AGG TCA TAA AGA   | CAC CAA AGA CGG CCA GGG CAG CCG GT             |
| C1qbp      | TGC ACA CGG AAG GAG ACA AGG CCT TC    | CGG CAA CTT TGC GCA ATA ATT TAG CC             |
| Siah1a     | GAG GGT ACC TGC CTT GAC CGG           | AGA TGG CCA CTC TGA CAC TGA AGA ATA            |
